# Supplementary material
Source: PubMed Central journal article supplement (PMC3813837)
Supplement: 552dde32ec2f5e0ee7dd21d516efa4ec_genetics.113.154773-1.pdf [file 552dde32ec2f5e0ee7dd21d516efa4ec_genetics.113.154773-1.pdf]

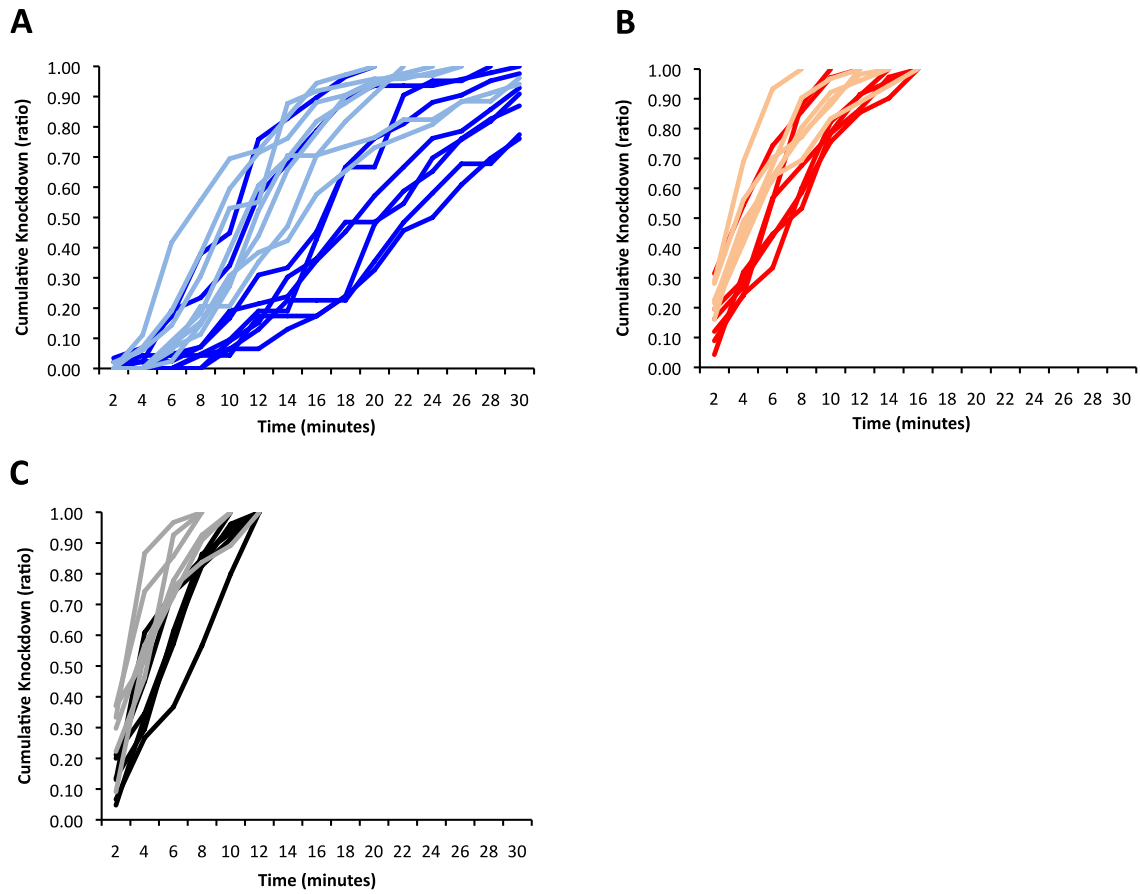

**Figure S3** Plot of cumulative distribution of OA tolerance of all replicates for the comparison between (A) High 10 males (light blue) and females (dark blue), (B) Low 10 males (orange) and females (red), and (C) *D. simulans* males (gray) and females (black).
