# Supplementary material
Source: PubMed Central journal article supplement (PMC3813837)
Supplement: 596f3dd398403ddc1ffc8d7ff550dc1e_genetics.113.154773-6.pdf [file 596f3dd398403ddc1ffc8d7ff550dc1e_genetics.113.154773-6.pdf]

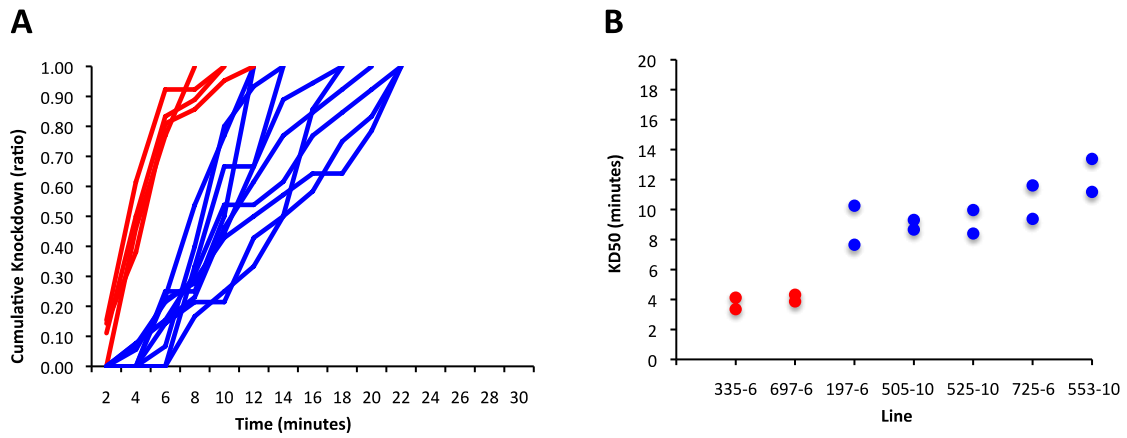

**Figure S4** Cumulative distributions of percent knockdown over time for males of the seven boundary lines. Each of these lines has a boundary marker immediately flanking the 18-gene region (i.e. the OA tolerance locus). The introgressions for 335-6 and 697-6 stop short of including the OA tolerance locus, while the other five lines contain it. (A) Plot of the cumulative distributions of all replicates of the seven boundary lines (two replicates per line). (B) Plot of the KD50 (in minutes) for all replicates of the boundary lines. Blue represents line called as high tolerance, while red is for low tolerance. These lines were used for the *M. citrifolia* tests described in the Materials and Methods.
