# Supplementary material
Source: PubMed Central journal article supplement (PMC3813837)
Supplement: 73124a0af19aa2defdbdf45e34f79e8d_genetics.113.154773-9.pdf [file 73124a0af19aa2defdbdf45e34f79e8d_genetics.113.154773-9.pdf]

**Table S3 Gene ontology of genes in tolerance region**

| <b>CG</b> | <b>Symbol</b>  | <b>Gene Ontology Terms</b>                                                         |
|-----------|----------------|------------------------------------------------------------------------------------|
| CG10287   | <i>Gasp</i>    | Chitin binding and metabolic process; structural component of peritrophiv membrane |
| CG15582   | <i>Obp83cd</i> | Odorant binding; sensory perception of chemical stimulus                           |
| CG31557   | <i>Obp83ef</i> | Odorant binding; sensory perception of chemical stimulus                           |
| CG31558   | <i>Obp83g</i>  | Odorant binding; sensory perception of chemical stimulus                           |
| CG1076    | <i>Vha14-2</i> | Hydrogen-exporting ATPase activity, phosphorylative mechanism                      |
| CG31559   | CG31559        | Electron carrier activity; protein disulfide oxidoreductase activity               |
| CG1077    | CG1077         | Protease inhibitor                                                                 |
| CG15585   | <i>Osi1</i>    | Unknown function; protein features similar to DUF1676; integral to plasma membrane |
| CG31562   | CG31562        | Unknown function; protein features similar to DUF227, CHK kinase-like              |
| CG1147    | <i>NPFR1</i>   | Neuropeptide F, Y, and tachykinin receptor activity; GPCR signaling pathway        |
| CG15589   | <i>Osi24</i>   | Unknown function                                                                   |
| CG1148    | <i>Osi2</i>    | Unknown function; protein features similar to DUF1676; integral to plasma membrane |
| CG1150    | <i>Osi3</i>    | Unknown function; protein features similar to DUF1676; integral to plasma membrane |
| CG10303   | <i>Osi4</i>    | Unknown function; integral to plasma membrane                                      |
| CG15590   | <i>Osi5</i>    | Unknown function; integral to plasma membrane                                      |
| CG1151    | <i>Osi6</i>    | Unknown function; protein features similar to DUF1676                              |
| CG1153    | <i>Osi7</i>    | Unknown function; protein features similar to DUF1676; integral to plasma membrane |
| CG15591   | <i>Osi8</i>    | Unknown function; integral to plasma membrane                                      |
