# Supplementary material
Source: PubMed Central journal article supplement (PMC3813837)
Supplement: 43518381e8cc674b36402122fd91073c_genetics.113.154773-12.pdf [file 43518381e8cc674b36402122fd91073c_genetics.113.154773-12.pdf]

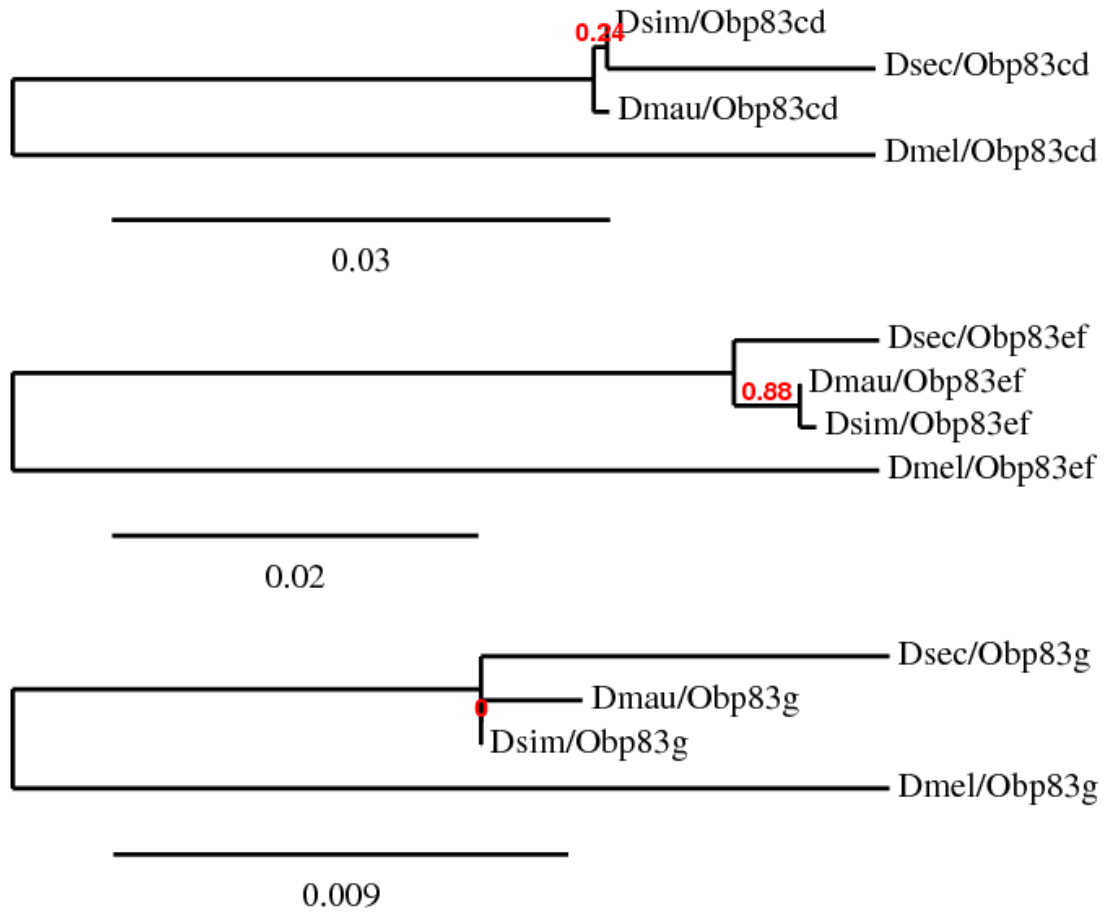

**Figure S5** Maximum likelihood phylogenies of Odorant Binding Proteins within the tolerance region. Although two of three trees are unresolved, the *Obp83ef* trees shows that *D. sechellia* tends to have the unusual allele. Phylogenies were made using <http://www.phylogeny.fr/>. Bootstrap values are in red.
