# Supplementary material
Source: PubMed Central journal article supplement (PMC3813837)
Supplement: cefc52da9b39e780afbc7341125a70e2_genetics.113.154773-3.pdf [file cefc52da9b39e780afbc7341125a70e2_genetics.113.154773-3.pdf]

**Table S4** Number of non-synonymous and syntenic sites for genes in tolerance region

| CG      | Symbol         | Non-synonymous sites |                | Syntenic sites included in: |           |             |
|---------|----------------|----------------------|----------------|-----------------------------|-----------|-------------|
|         |                | <i>D. sim</i>        | <i>D. sech</i> | Ka/Ks                       | Alignment | Missing seq |
| CG10287 | <i>Gasp</i>    | 1                    | 1              | 708                         | 708       | 0           |
| CG15582 | <i>Obp83cd</i> | 0                    | 5              | 729                         | 729       | 0           |
| CG31557 | <i>Obp83ef</i> | 1                    | 1              | 738                         | 738       | 0           |
| CG31558 | <i>Obp83g</i>  | 0                    | 2              | 441                         | 441       | 0           |
| CG1076  | CG1076         | 0                    | 1              | 111 <sup>a</sup>            | 390       | 0           |
| CG31559 | CG31559        | 2                    | 2 <sup>b</sup> | 1365                        | 1365      | 0           |
| CG1077  | CG1077         | 11 <sup>c</sup>      | 6              | 2193                        | 2193      | 0           |
| CG15585 | <i>Osi1</i>    | 1                    | 2 <sup>d</sup> | 513                         | 513       | 414         |
| CG31562 | CG31562        | 2                    | 5              | 765 <sup>e</sup>            | 792       | 27          |
| CG1147  | <i>NPFR1</i>   | 0                    | 1              | 1458                        | 1458      | 0           |
| CG15589 | CG15589        | 2                    | 5              | 1447 <sup>f</sup>           | 1602      | 0           |
| CG1148  | <i>Osi2</i>    | 0                    | 0              | 1173                        | 1173      | 0           |
| CG1150  | <i>Osi3</i>    | 0                    | 0              | 867                         | 867       | 0           |
| CG10303 | <i>Osi4</i>    | 3                    | 1              | 717 <sup>g</sup>            | 1182      | 0           |
| CG15590 | <i>Osi5</i>    | 0                    | 1              | 609                         | 609       | 0           |
| CG1151  | <i>Osi6</i>    | 0                    | 0              | 939                         | 939       | 0           |
| CG1153  | <i>Osi7</i>    | 0                    | 0              | 115                         | 115       | 752         |
| CG15591 | <i>Osi8</i>    | 6                    | 1 <sup>i</sup> | 309 <sup>h</sup>            | 825       | 0           |

<sup>a</sup> Frameshift deletion at 112 in both *D. simulans* (10 bp) and *D. sechellia* (8 bp)

<sup>b</sup> In-frame deletion at 646 in *D. sechellia* (9 bp)

<sup>c</sup> In-frame deletion at 436 in *D. simulans* (6 bp)

<sup>d</sup> In-frame deletion at 154 in *D. sechellia* (3 bp)

<sup>e</sup> Pre-mature stop codon ending at 765 in *D. sechellia*

<sup>f</sup> Pre-mature stop codon ending at 1447 in *D. sechellia*

<sup>g</sup> Frameshift deletion at 718 in *D. simulans* (1 bp)

<sup>h</sup> Pre-mature stop codon ending at 309 in *D. simulans*

<sup>i</sup> One additional non-syn site in *D. sechellia* from *D. melanogaster* after pre-mature stop in *D. simulans*
